# Supplementary material for: Protocol for a feasibility trial to inform the development of a breathlessness rehabilitation programme for chronic obstructive pulmonary disease and chronic heart failure (the COHERE trial)
Source: PubMed Central journal article supplement — BMJ Open. 2019 Jul 16;9(7):e029387. doi: 10.1136/bmjopen-2019-029387 (PMC6661899; doi:10.1136/bmjopen-2019-029387), 2019-07-16
Supplement: bmjopen-2019-029387.draft_revisions.pdf [file bmjopen-2019-029387.draft_revisions.pdf]

# BMJ Open

BMJ Open is committed to open peer review. As part of this commitment we make the peer review history of every article we publish publicly available.

When an article is published we post the peer reviewers' comments and the authors' responses online. We also post the versions of the paper that were used during peer review. These are the versions that the peer review comments apply to.

The versions of the paper that follow are the versions that were submitted during the peer review process. They are not the versions of record or the final published versions. They should not be cited or distributed as the published version of this manuscript.

BMJ Open is an open access journal and the full, final, typeset and author-corrected version of record of the manuscript is available on our site with no access controls, subscription charges or pay-per-view fees (<http://bmjopen.bmj.com>).

If you have any questions on BMJ Open's open peer review process please email [info.bmjopen@bmj.com](mailto:info.bmjopen@bmj.com)

# BMJ Open

## Protocol for a feasibility trial to inform the development of a breathlessness rehabilitation programme for Chronic Obstructive Pulmonary Disease and Chronic Heart Failure (The COHERE Trial)

|                               |                                                                                                                                                                                                                                                                                                                                                                                                                                                                                                                                                                                                                                                                                                                                                                                                                                                                                                                                                                                                                                                                                                                                                                                          |
|-------------------------------|------------------------------------------------------------------------------------------------------------------------------------------------------------------------------------------------------------------------------------------------------------------------------------------------------------------------------------------------------------------------------------------------------------------------------------------------------------------------------------------------------------------------------------------------------------------------------------------------------------------------------------------------------------------------------------------------------------------------------------------------------------------------------------------------------------------------------------------------------------------------------------------------------------------------------------------------------------------------------------------------------------------------------------------------------------------------------------------------------------------------------------------------------------------------------------------|
| Journal:                      | <i>BMJ Open</i>                                                                                                                                                                                                                                                                                                                                                                                                                                                                                                                                                                                                                                                                                                                                                                                                                                                                                                                                                                                                                                                                                                                                                                          |
| Manuscript ID                 | bmjopen-2019-029387                                                                                                                                                                                                                                                                                                                                                                                                                                                                                                                                                                                                                                                                                                                                                                                                                                                                                                                                                                                                                                                                                                                                                                      |
| Article Type:                 | Protocol                                                                                                                                                                                                                                                                                                                                                                                                                                                                                                                                                                                                                                                                                                                                                                                                                                                                                                                                                                                                                                                                                                                                                                                 |
| Date Submitted by the Author: | 24-Jan-2019                                                                                                                                                                                                                                                                                                                                                                                                                                                                                                                                                                                                                                                                                                                                                                                                                                                                                                                                                                                                                                                                                                                                                                              |
| Complete List of Authors:     | <p>Jones, Amy; Loughborough University, National Centre for Sport and Exercise Medicine, School of Sport, Exercise and Health Sciences; National Institute for Health Research, Centre for Exercise and Rehabilitation Sciences, Leicester Biomedical Research Centre-Respiratory</p> <p>Evans, Rachael; University of Leicester, Respiratory Sciences; National Institute for Health Research, Centre for Exercise and Rehabilitation Sciences, Leicester Biomedical Research Centre- Respiratory</p> <p>Esliger, Dale; Loughborough University, National Centre for Sport and Exercise Medicine, Sport, Exercise and Health Sciences; National Institute for Health Research, Leicester Biomedical Research Centre-Lifestyle</p> <p>Sherar, Lauren; Loughborough University, National Centre for Sport and Exercise Medicine, School of Sport, Exercise and Health Sciences; National Institute for Health Research, Leicester Biomedical Research Centre- Lifestyle</p> <p>Singh, Sally; National Institute for Health Research, Centre for Exercise and Rehabilitation Sciences, Leicester Biomedical Research Centre-Respiratory; University of Leicester, Respiratory Sciences</p> |
| Keywords:                     | Heart failure < CARDIOLOGY, Chronic airways disease < THORACIC MEDICINE, REHABILITATION MEDICINE                                                                                                                                                                                                                                                                                                                                                                                                                                                                                                                                                                                                                                                                                                                                                                                                                                                                                                                                                                                                                                                                                         |
|                               |                                                                                                                                                                                                                                                                                                                                                                                                                                                                                                                                                                                                                                                                                                                                                                                                                                                                                                                                                                                                                                                                                                                                                                                          |

SCHOLARONE™  
Manuscripts

1  
2  
3 **Protocol for a feasibility trial to inform the development of a breathlessness rehabilitation**  
4 **programme for Chronic Obstructive Pulmonary Disease and Chronic Heart Failure (The**  
5 **COHERE Trial)**  
6  
7

8  
9 *Amy V Jones*<sup>1,2</sup>, *Rachael A Evans*<sup>1,2,3</sup>, *Dale W Esliger*<sup>1,4</sup>, *Lauren B Sherar*<sup>1,4</sup>, *Sally J Singh*<sup>1,2,3</sup>  
10  
11

12  
13 <sup>1</sup> National Centre for Sport and Exercise Medicine, School of Sport, Exercise and Health Sciences,  
14 Loughborough University, United Kingdom

15  
16 <sup>2</sup> Centre for Exercise and Rehabilitation Science, National Institute for Health Research, Leicester  
17 Biomedical Research Centre-Respiratory theme, Leicester, United Kingdom

18  
19 <sup>3</sup> Respiratory Sciences, University of Leicester, Leicester, United Kingdom

20  
21 <sup>4</sup> National Institute for Health Research, Leicester Biomedical Research Centre-Lifestyle theme,  
22 Leicester, United Kingdom  
23

24  
25 Amy V Jones (corresponding author)  
26 School of Sport, Exercise and Health Sciences  
27 Sir John Beckwith Building  
28 Epinal Way  
29 Loughborough University  
30 LE11 3TU  
31 [a.v.jones@lboro.ac.uk](mailto:a.v.jones@lboro.ac.uk)  
32  
33 Tel: +44 (0)1509 226302  
34  
35  
36

37 **Word count: 3130**  
38  
39

40 **ORCID iD:**

41 Amy V Jones <https://orcid.org/0000-0001-6565-8645>  
42 Rachael A Evans <https://orcid.org/0000-0002-1667-868X>  
43 Dale W Esliger <https://orcid.org/0000-0002-1236-6419>  
44 Lauren B Sherar <https://orcid.org/0000-0002-9942-5433>  
45 Sally J Singh <https://orcid.org/0000-0002-9834-0366>  
46  
47  
48  
49  
50  
51  
52  
53  
54  
55  
56  
57  
58  
59  
60

## ABSTRACT

### Introduction

Patients with Chronic Obstructive Pulmonary Disease (COPD) and Chronic Heart Failure (CHF) commonly suffer from exertional dyspnoea and fatigue. Exercise training is recommended in the management of both diseases, yet many of the outcome measures traditionally reported are disease specific and may not fully acknowledge the multimorbid older adult. Based on our previous research, a breathlessness rehabilitation programme for patients with COPD/CHF or combined disease has been introduced as a service improvement within University Hospital Leicester NHS Trust and has amalgamated aspects of cardiac (CR) and pulmonary (PR) rehabilitation. This has created an opportunity to expand the outcome measures assessed and introduce a holistic approach in a population that share common symptoms. Therefore, this trial will explore the feasibility of collecting novel outcome markers as part of a comprehensive assessment prior to enrolment in a breathlessness rehabilitation programme for participants with COPD and/or CHF.

### Methods and Analysis

The rehabilitation programme consists of 12 sessions, twice weekly, over a 6-week period. In addition to usual rehabilitation outcome measures, the trial will collect measures of future cardio-metabolic risk including arterial stiffness, body composition, physical activity/sedentary time, frailty, and symptom burden in a comprehensive rehabilitation assessment. The primary outcome measures will centre around feasibility (e.g. acceptability of the comprehensive rehabilitation assessment, intervention delivery and the experiences and attitudes of healthcare professionals and participants). Focus groups and interviews will be conducted further explore barriers and facilitators to the operation and participation in a breathlessness rehabilitation programme and the trial. Thematic analysis will be used for the interpretation of all qualitative data.

### Ethics and dissemination

The research ethics committee East Midlands Leicester-Central has provided ethical approval for the conduct of this trial. The results of the trial will be disseminated through appropriate conference proceedings and peer-reviewed journals.

### Trial registration number

ISRCTN11636308

## ARTICLE SUMMARY

### Strengths and limitations of this trial

- Assess feasibility of a comprehensive rehabilitation assessment, in which a novel set of outcome measures are explored within breathlessness rehabilitation

- 1
- 2
- 3 • Assess the feasibility of delivering a new breathlessness rehabilitation programme
- 4
- 5 • This trial will provide important insights into the COPD and CHF population
- 6 undergoing exercise rehabilitation
- 7
- 8 • There is no comparison group or control data as rehabilitation is a NICE
- 9 recommendation for both COPD and CHF.
- 10
- 11
- 12
- 13
- 14
- 15
- 16
- 17
- 18
- 19
- 20
- 21
- 22
- 23
- 24
- 25
- 26
- 27
- 28
- 29
- 30
- 31
- 32
- 33
- 34
- 35
- 36
- 37
- 38
- 39
- 40
- 41
- 42
- 43
- 44
- 45
- 46
- 47
- 48
- 49
- 50
- 51
- 52
- 53
- 54
- 55
- 56
- 57
- 58
- 59
- 60

For peer review only

## INTRODUCTION

Individuals with Chronic Obstructive Pulmonary Disease (COPD) and Chronic Heart Failure (CHF) commonly suffer from exertional dyspnoea and the conditions often co-exist.[1] The prevalence of COPD in the CHF population has been suggested to range from 9-52% in European and North American populations [2] and estimates of the prevalence of CHF in the COPD population are around 17 - 20.5%.[3,4]

Exercise training is recommended in the management of both diseases [1,5,6] and forms an integral component of cardiac (CR) and pulmonary (PR) rehabilitation programmes[7,8] PR is a symptom based multidisciplinary programme of exercise training, education and behaviour change.[9] Hospital days per patient [10] and healthcare utilisation [11] have been shown to be reduced with PR. Commonly reported outcome measures for PR include quality of life, and maximal and functional exercise capacity reported by the Cochrane Systematic Review on PR for COPD [12] and the 2017 National COPD PR audit in England and Wales, the latter also reporting measures of dyspnoea and muscle strength.[13] Indicators of cardiovascular risk were not reported, despite cardiovascular disease being a leading cause of death in those with mild to moderate COPD.[14]

CR is also a complex intervention and consists of health education and exercise training.[15] The 2017 UK National CR Audit reported change in self-report physical activity, smoking status, Body Mass Index (BMI), mood state, quality of life, maximal and functional exercise capacity and additional cardiovascular risk factors in all those that completed CR.[16] CR has been shown to reduce the risk of overall and CHF specific hospitalisation compared to usual care.[17] Clinically important improvements in quality of life after exercise based rehabilitation have been reported in a CHF population.[17] Despite this, just 5.2% of patients that started CR in England, Wales, Northern Ireland, Isle of Man and the Channel Islands in 2017 had a diagnosis of CHF.[16] The disability associated with CHF is more similar to COPD as opposed to a post myocardial infarction population.[18] The symptom-based model of PR including an individualised exercise prescription may be more appropriate for patients with CHF.[19]

The model of PR was successfully expanded to include patients with CHF, and in a randomised controlled trial of either PR or usual care (no rehabilitation) patients undergoing PR made improvements in exercise capacity and quality of life.[20] In the same trial, patients with CHF exercised alongside patients with COPD and the improvements in exercise capacity (assessed by the Incremental Shuttle Walk Test [ISWT] [21] and Endurance Shuttle Walk Test [ESWT]) [22] were similar across groups, regardless of diagnosis. This trial was the first to suggest the model of PR is suitable for patients with CHF, to apply a 'symptom-based' approach to rehabilitation, and to show that both groups of

1  
2  
3 patients could be trained together. Of note, in this study participants had either COPD or CHF and those  
4 with both pathologies were excluded.  
5  
6  
7

8 Creating a rehabilitation programme in which relevant and appropriate outcome measures are assessed  
9 in patients that present with similar symptoms, regardless of their primary disease, appears to be a  
10 suitable advancement within cardiopulmonary-rehabilitation.[23] Additionally, there is growing  
11 recognition of the multimorbid patient [24] and historically, this has not been assessed in either CR or  
12 PR, where the outcome measures assessed are largely disease specific. The establishment of a  
13 comprehensive rehabilitation assessment that incorporates measures from traditional CR and PR, as  
14 well as holistic measures of frailty and cardio-metabolic risk will further our knowledge of symptom-  
15 based rehabilitation to ensure a patient-centred approach, recognising the burden and multi-morbidity.  
16  
17  
18  
19  
20  
21

22 Thus, the primary objective of the COHERE trial (COpd and HEart failure REhabilitation) will be to  
23 assess the feasibility of a breathlessness rehabilitation programme, including the collection of additional  
24 outcome measures, the delivery of the intervention and recruitment rates. The acceptability of the  
25 breathlessness rehabilitation programme and COHERE trial will be explored through the experiences  
26 and views of participants and healthcare professionals.  
27  
28  
29  
30  
31  
32

## 33 **METHODS AND ANALYSIS**

### 34 **Trial design and registration**

35 This is a multi-site feasibility trial, assessing novel outcome measures within a breathlessness  
36 rehabilitation programme for participants with a diagnosis of COPD and/or CHF. The rehabilitation  
37 programme is managed by University Hospitals of Leicester NHS Trust. Data will be collected at the  
38 Biomedical Research Centre Respiratory, Leicester, UK as well as the centres delivering rehabilitation.  
39 This trial will be conducted, analysed and reported according to the Consolidation Standards of  
40 Reporting Trials (CONSORT) statement for feasibility trials. [25]  
41  
42  
43  
44  
45  
46

47 This trial has been registered on the ISRCTN website and The University Hospitals of Leicester NHS  
48 Trust will act as study sponsor.  
49  
50  
51

### 52 **Patient and public involvement**

53 The trial design was shared with patients enrolled in the breathlessness rehabilitation programme, prior  
54 to the trial commencing. Results will be disseminated to current and former pulmonary and cardiac  
55 rehabilitation patients or interested members of the public within the local Pulmonary and Cardiac  
56 Rehabilitation Patient and Public Involvement Advisory group.  
57  
58  
59  
60

## Participants

### Eligibility criteria for patients

Patients eligible for inclusion in the trial will be: aged between 40 and 85 years, have a confirmed diagnosis of COPD/CHF or combined disease, with an Medical Research Council (MRC) dyspnoea score 2 and above and will be referred to breathlessness rehabilitation as part of their standard care.

### Eligibility criteria for healthcare professionals

All healthcare professionals actively involved in the breathlessness rehabilitation programme will be invited to take part in a focus group.

## Setting

The current sites for the University Hospitals of Leicester NHS Trust and Leicestershire Partnership Trust (LPT) breathlessness rehabilitation programme are Glenfield Hospital, Groby Road, Leicester, UK and the National Centre for Sports and Exercise Medicine, Loughborough University, Loughborough, UK.

## Procedure

Once a referral has been received by the rehabilitation team, eligible individuals will receive an invitation letter, reply slip and a detailed participant information sheet. This information will be given in person or sent by post. For those that decline the trial, reasons for this (if offered freely) may be taken as field notes or by an interview if participants consent to this. Interested participants will then be contacted and if appropriate, a research visit will be arranged. Once written informed consent has been provided, the participant's involvement in the trial and any relevant results will be shared with their general practitioner (GP). Data from their usual care rehabilitation assessment will be recorded. Where possible, the research visits will occur at least 14 days prior to and upon completion of the rehabilitation programme. Participants will be asked to attend the visits after an overnight fast. Upon completion of the rehabilitation programme, participants repeat the research visit and usual rehabilitation assessment. Voluntary interviews or focus groups will then occur.

### Intervention: Breathlessness rehabilitation programme

The breathlessness rehabilitation programme is led by experienced physiotherapists, nurses and healthcare professionals. The programme consists of 12 supervised classes (typically twice a week for six weeks), with each class consisting of exercise training and education. The exercises consist of a combination of traditional CR and PR activities. Participants are led through a progressive warm up,



before completing individually prescribed aerobic and strength exercises. The aerobic components include walking (floor or treadmill) and stationary cycle ergometers. The ISWT [21] is used to predict peak oxygen consumption (VO<sub>2</sub>) and walking speed is prescribed at 80-85%peak VO<sub>2</sub>. [22] The Borg Scale of Perceived Exertion [26] and the Modified Borg Breathlessness Scale [27] are used to progress the exercise prescription. The strength component consists of sit-to-stand exercises (weighted if appropriate), bicep curls, upright rows and step ups. Participants are encouraged to complete 10 repetitions of each strength exercise 3 times per class. Participants are then led through a supervised cool-down before the educational component of the class. The educational topics covered within the breathlessness rehabilitation programme are presented in table 1. Outside of the supervised classes, participants are encouraged to complete a timed walk every day and strength training once a week at home/ unsupervised.

*Table 1: Educational topics covered within breathlessness rehabilitation programme*

|                                     |                                                                                                                                                                                            |
|-------------------------------------|--------------------------------------------------------------------------------------------------------------------------------------------------------------------------------------------|
| All patients                        | Benefits of exercise<br>Managing breathlessness<br>Relaxation techniques<br>Healthy eating<br>Energy conservation<br>Goal setting<br>Managing anxiety<br>Question and Answers/ Signposting |
| Groups divided by primary diagnosis | Medications<br>Disease education<br>Managing exacerbations/ symptom control<br>Chest clearance/ FAQs                                                                                       |

### Acceptability

The acceptability of the COHERE trial and the breathlessness rehabilitation programme will be assessed by the following, although not limited to:

- A. Participant's experience of the COHERE trial will be explored in qualitative interviews and focus groups
- B. Participant's experience of the breathlessness rehabilitation programme will be explored in qualitative interviews and focus groups
- C. Proportion of participants who attended the follow up research visit and reasons why participants did not complete the trial (assessed by interviews)
- D. The experience of healthcare professionals regarding the breathlessness rehabilitation programme, such as their confidence in working with varied cardiorespiratory patients, the content/ structure of the breathlessness rehabilitation programme and the combining of CR and PR staff
- E. The views of healthcare professionals regarding the COHERE trial, such as the collection of additional outcome measures and coordination of the programme with the trial.

## Feasibility

Measures for assessing feasibility are provided in table 2 and will include the comprehensive rehabilitation assessment, intervention delivery and recruitment.

Table 2: Feasibility of assessment and outcome measures

| INDICATORS                                                                                                                            | DATA SOURCES                                                               |
|---------------------------------------------------------------------------------------------------------------------------------------|----------------------------------------------------------------------------|
| <b><i>Comprehensive Rehabilitation Assessment</i></b>                                                                                 |                                                                            |
| Completeness of additional outcome measures                                                                                           | Case report forms                                                          |
| Acceptability                                                                                                                         | Interviews and focus groups with participants and healthcare professionals |
| <b><i>Intervention delivery &amp; Process Evaluation</i></b>                                                                          |                                                                            |
| Completeness of usual care outcome measures                                                                                           | PR records                                                                 |
| Number of rehabilitation classes completed                                                                                            | PR records                                                                 |
| Number of participants that drop-out from rehabilitation programme                                                                    | PR records                                                                 |
| The experience of healthcare professionals regarding breathlessness rehabilitation and the COHERE trial                               | Interviews and focus groups with healthcare professionals                  |
| The experience of participants regards breathlessness rehabilitation and the COHERE trial                                             | Interviews and focus groups with participants                              |
| The training and resources needed to deliver the intervention                                                                         | Interviews and focus groups with healthcare professionals                  |
| <b>Recruitment</b>                                                                                                                    |                                                                            |
| Feasibility of screening and recruiting participants                                                                                  | Trial records and field notes                                              |
| Number of eligible participants, number of participants invited to participate in trial, number of participants that consent to trial | Medical records and trial records                                          |
| Number of participants that decline or drop out of trial                                                                              | Trial records                                                              |

## Data collection

Data will be collected following standard operating procedures and will occur during specific research visits and usual care rehabilitation appointments. The timing of baseline and follow up data collection cannot be standardised due to variation in the timing of participant's starting and completing rehabilitation.

## Sample characteristics

### Body composition

At both research visits, height, weight and waist circumference will be measured to the nearest 0.1cm, 0.1kg and 0.1cm respectively. Waist circumference will be measured twice, unless the difference between the first two measurements is >3cm, in which case a third measurement will be taken. Bioelectrical Impedance Analysis (BIA) will be performed using a dual sensor scale (Tanita MC-780 MA P; Tanita, Tokyo, Japan).

### Physical function

The following three assessments are usual care and will be completed by healthcare professionals:

1. Maximal exercise capacity will be assessed using the ISWT.[21]
2. Endurance exercise capacity will be assessed using the ESWT,[22] in which a participant aims to walk at 85% of their maximal ISWT walking speed.
3. Quadriceps strength will be assessed using an isometric maximum voluntary contraction (QMVC). Participants will identify their dominant leg and where possible, three attempts will be made.

### Frailty

Frailty is a clinical syndrome that is highly prevalent in old age [28] and focuses on a holistic approach as opposed to organ-specific diagnoses. [29] It has been suggested that 25% of patients with COPD that are referred to PR [30] are frail and it is highly prevalent in those with CHF.[31] The Short Physical Performance Battery (SPPB) [32] will be measured which comprises of a series of three brief assessments; a standing balance test, a gait speed test and repeated sit-to stand tests.

### Cardio-metabolic health

Venous blood samples will be analysed for triglycerides, total cholesterol, low-density lipoproteins, high-density lipoproteins, glycated haemoglobin, plasma glucose, fibrinogen, high-sensitivity c-reactive protein and B type natriuretic peptide (BNP). BNP will only be analysed at the baseline research visit. All samples assessing cardio-metabolic health will be taken in a fasted state.

Arterial stiffness will be assessed, specifically pulse wave velocity and pulse wave analysis using the Vicorder (Smart Medical, Gloucestershire, UK), according to manufacturer's instructions. Participants will rest in the supine position for 5 minutes, before any measurements are taken. The air temperature in the room will be set at 21°C and the participants will lie on a bed set to 30° with a pillow supporting them.

### Respiratory health

Lung function will be assessed by forced spirometry using a Vitalograph Pneumotrac 6800 (Vitalograph, Buckingham, UK) according to international guidelines.[33] The device will be calibrated daily, and the pass/fail criteria is +/-3.0% of a fixed 3L volume. The absolute and relative contraindications will be examined for each participant.[34] Participants will wear a nose clip during each attempt.

### Symptoms and Psychosocial health

Questionnaires will be used to assess the presence and severity of participants' symptoms. The Hospital Anxiety and Depression Scale (HADS),[35] the Dartmouth COOP charts,[36] the COPD Assessment Test (CAT)[37] and the MRC breathlessness score [38] are collected in routine care. The latter two questionnaires are only routinely collected in those with a primary diagnosis of COPD, yet for research purposes, the MRC will be collected in all research participants. The Multidimensional Dyspnea Profile (MDP)[39] and the Dyspnea-12 (D-12)[40] will be used to assess breathlessness; the time frame for the MDP will state 'the last two weeks'. Fatigue will be assessed using the PROMIS Fatigue 7a Short Form [41] and health related quality of life will be assessed using the EQ-5D-5L.[42] The Chronic Heart Questionnaire Self Report [43] will be given to all participants to assess dyspnoea, fatigue and emotional function. Where possible, participants will independently complete the questionnaires. Efforts will be made to ensure all questionnaires are completed for research participants. The protocol has largely been developed to explore symptom-based and non-disease specific questionnaires due to the population being recruited.

### Objectively measured physical activity and time spent sedentary

Participants will be asked to wear a triaxial accelerometer (ActiGraph wGT3X-BT) using an adjustable waist belt with the monitor positioned over the right hip (midclavicular line) for 8 consecutive days preceding and again upon completion of rehabilitation. This will measure time spent sedentary and in physical activity (i.e. light, moderate and vigorous intensity) using cut-points, such as those published by Freedson et al [44] and step count. Participants will be asked to wear the device during all waking hours but to remove it for water-based activities and during sleep. The accelerometer will also be given to participants to wear during their usual care assessments and during each rehabilitation class.

### Self-reported physical activity

The clinical visit Pro-Active Questionnaire will be used,[45] in which participants recall physical activity over the last 7 days using a 35-item questionnaire. This is a hybrid tool containing self-report information and two variables derived from the accelerometer.

### **Sample size estimation and recruitment target**

1  
2  
3 As this is a feasibility trial, a formal sample size calculation is not required; however, the aim is to  
4 consent a minimum of 40 participants with a representative mix of COPD, CHF and combined disease.  
5  
6 The information gathered from this trial will be used to guide a sample size calculation for future  
7  
8 studies. Posters raising awareness of the trial and the breathlessness rehabilitation programme will be  
9  
10 placed within clinic rooms, the exercise rehabilitation departments and online through UHL staff  
11  
12 intranet. Efforts will also be made to raise awareness of the trial and the breathlessness rehabilitation  
13  
14 programme with clinicians and healthcare professionals whom regularly refer patients.  
15

### 16 **Quantitative data analyses**

17 As this is a feasibility trial, it is not appropriate to test for statistical differences over time or between  
18  
19 groups. Therefore, quantitative data will be largely descriptive. Independent t-tests or analysis of  
20  
21 variance (ANOVA) may be used to examine between group differences and paired sample t-tests or  
22  
23 repeated measures ANOVA may be used to examine within group differences. Categorical data may be  
24  
25 analysed using a chi-square or fishers exact test. Data will be entered and stored on a secure web-based  
26  
27 system, Research Electronic data Capture (REDCap) as well as local password-protected computer files  
28  
29 and drives. Analyses will be performed using Statistical Package for the Social Sciences (SPSS)  
30  
31 (Version 23.0, IBM Corp, Armonk, NY).  
32

33 Participants will be provided with a unique identification number, ensuring their data remains  
34  
35 confidential. Any written materials or results will be written to ensure participant data remains  
36  
37 confidential.  
38

### 39 **Qualitative research**

40  
41 The aim of the qualitative research will be to explore the participants' experience of a) the  
42  
43 breathlessness rehabilitation programme b) the COHERE trial and c) any barriers or facilitators to  
44  
45 participating and completing breathlessness rehabilitation. Participants that decline the trial are invited  
46  
47 to a refusal interview, either face to face or over the telephone, providing consent is given. The  
48  
49 qualitative data may provide information regarding the feasibility and scalability of the trial, reducing  
50  
51 future recruitment or retention issues. Upon completion of the trial, research participants will be invited  
52  
53 to a voluntary focus group or interview.  
54

55 Focus groups and/or interviews will be conducted with healthcare professionals that have been actively  
56  
57 involved in the COHERE trial, whereby the objective is to seek to understand the barriers, facilitators  
58  
59 and experiences on the delivery and implementation of the breathlessness rehabilitation programme and  
60  
the scalability of the COHERE trial in the future.

### Qualitative data analysis

The qualitative data will be recorded, transcribed and analysed using thematic analysis. Thematic analysis allows emerging, recurrent themes or patterns to be identified from the data.[46] All interviews and focus groups will be audio recorded with participant's consent and transcribed verbatim. Emerging themes will be identified throughout the trial, meaning the interview schedule and coding schedule are modified to follow new leads until new themes no longer emerge. In line with thematic analysis, there is no pre-specified sample size; recruitment continues until no new themes emerge.

### ETHICS AND DISSEMINATION

Findings from this feasibility trial will inform the design of future trials, largely the primary outcome measure and trial protocol. Furthermore, the findings will be shared locally with secondary care interface groups such as service managers. Some trial findings may be shared with national and international visitors who come to share our practice and a summary of the trial results will also be provided to participants. It is anticipated that the results from this feasibility trial will be presented at appropriate national, international and regional conferences; local trial days; and through peer-reviewed journals.

### Research ethics approval

The trial is sponsored by the University Hospitals of Leicester NHS Trust (trial number 105410) and ethical approval was given by Leicester South Research Ethics Committee (REC reference: 18/EM/0051). Guidelines will be followed when protocol amendments are needed.

### Protocol amendments

Any modifications to the protocol will be approved by Leicester South Research Ethics Committee prior to implementation and notified to the health authorities in accordance with local regulations.

### FULL REFERENCES

- 1 Global Initiative for Chronic Obstructive Lung Disease (GOLD). Global strategy for the diagnosis, management, and prevention of Chronic Obstructive Pulmonary Disease (2019 Report). 2019. [http://www.who.int/respiratory/copd/GOLD\\_WR\\_06.pdf](http://www.who.int/respiratory/copd/GOLD_WR_06.pdf)
- 2 Hawkins NM, Petrie MC, Jhund PS, *et al.* Heart failure and chronic obstructive pulmonary disease: diagnostic pitfalls and epidemiology. *Eur J Heart Fail* 2009;11:130–9. doi:10.1093/eurjhf/hfn013
- 3 Rutten FH, Cramer MJ, Grobbee DE, *et al.* Unrecognized heart failure in elderly patients with stable chronic obstructive pulmonary disease. *Eur Heart J* 2005;26:1887–94. doi:10.1093/eurheartj/ehi291
- 4 Macchia A, Rodriguez Moncalvo JJ, Kleinert M, *et al.* Unrecognised ventricular dysfunction



- 1  
2  
3 in COPD. *Eur Respir J* 2012;39:51–8. doi:10.1183/09031936.00044411
- 4  
5 Yancy CW, Jessup M, Bozkurt B, *et al.* 2013 ACCF/AHA Guideline for the Management of  
6 Heart Failure: A Report of the American College of Cardiology Foundation/American Heart  
7 Association Task Force on Practice Guidelines. 2013. doi:10.1161/CIR.0b013e31829e8776
- 8  
9 National Institute of Health and Care Excellence. Chronic heart failure in adults: diagnosis and  
10 management. 2018. <https://www.nice.org.uk/guidance/ng106>
- 11  
12 British Thoracic Society. Quality Standards for Pulmonary Rehabilitation in Adults. 2014.  
13 [https://www.brit-thoracic.org.uk/document-library/clinical-information/pulmonary-](https://www.brit-thoracic.org.uk/document-library/clinical-information/pulmonary-rehabilitation/bts-quality-standards-for-pulmonary-rehabilitation-in-adults/)  
14 [rehabilitation/bts-quality-standards-for-pulmonary-rehabilitation-in-adults/](https://www.brit-thoracic.org.uk/document-library/clinical-information/pulmonary-rehabilitation/bts-quality-standards-for-pulmonary-rehabilitation-in-adults/)
- 15  
16 British Association for Cardiovascular Prevention and Rehabilitation. The BACPR Standards  
17 and Core Components for Cardiovascular Disease Prevention and Rehabilitation (3rd edition).  
18 2017. [http://www.bacpr.com/resources/AC6\\_BACPRStandards&CoreComponents2017.pdf](http://www.bacpr.com/resources/AC6_BACPRStandards&CoreComponents2017.pdf)
- 19  
20 Spruit MA, Singh SJ, Garvey C, *et al.* An Official American Thoracic Society/European  
21 Respiratory Society Statement: Key concepts and Advances in Pulmonary Rehabilitation. *Am*  
22 *J Respir Crit Care Med* 2013;188:e13–64. doi:10.1164/rccm.201309-1634ST
- 23  
24 Griffiths TL, Burr ML, Campbell IA, *et al.* Results at 1 year of outpatient multidisciplinary  
25 pulmonary rehabilitation: a randomised controlled trial. *Lancet* 2000;355:362–8.  
26 doi:10.1016/S0140-6736(99)07042-7
- 27  
28 Raskin J, Spiegler P, McCusker C, *et al.* The effect of pulmonary rehabilitation on healthcare  
29 utilization in chronic obstructive pulmonary disease: The Northeast Pulmonary Rehabilitation  
30 Consortium. *J Cardiopulm Rehabil* 2006;26:231–  
31 6.<http://www.ncbi.nlm.nih.gov/pubmed/16926687>
- 32  
33 McCarthy B, Casey D, Devane D, *et al.* Pulmonary rehabilitation for chronic obstructive  
34 pulmonary disease. *Cochrane Database Syst Rev* Published Online First: 2015.  
35 doi:10.1002/14651858.CD003793.pub3
- 36  
37 Steiner MC, Holzhauser- Barrie J, Lowe D, *et al.* Pulmonary Rehabilitation: Steps to breathe  
38 better. National Chronic Obstructive Pulmonary Disease (COPD) Audit Programme: Clinical  
39 audit of Pulmonary Rehabilitation services in England and Wales 2015. 2016.  
40 <https://www.rcplondon.ac.uk/projects/outputs/pulmonary-rehabilitation-steps-breathe-better>
- 41  
42 Patel ARC, Hurst JR. Extrapulmonary comorbidities in chronic obstructive pulmonary disease:  
43 state of the art. *Expert Rev Respir Med* 2011;5:647–62. doi:10.1586/ers.11.62
- 44  
45 Dalal H. Cardiac rehabilitation. *Br Med J* 2015;351. doi:10.1136/bmj.h5000
- 46  
47 British Heart Foundation. National Audit of Cardiac Rehabilitation: Annual Statistical Report  
48 2017. 2017. [https://www.bhf.org.uk/publications/statistics/national-audit-of-cardiac-](https://www.bhf.org.uk/publications/statistics/national-audit-of-cardiac-rehabilitation-annual-statistical-report-2017)  
49 [rehabilitation-annual-statistical-report-2017](https://www.bhf.org.uk/publications/statistics/national-audit-of-cardiac-rehabilitation-annual-statistical-report-2017)
- 50  
51 Sagar VA, Davies EJ, Briscoe S, *et al.* Exercise-based rehabilitation for heart failure:  
52 systematic review and meta-analysis. *Open Hear* 2015;2:1–12. doi:10.1136/openhrt-2014-
- 53  
54  
55  
56  
57  
58  
59  
60

- 000163
- 18 Reardon JZ, Levine S, Peske G, *et al.* A comparison of outpatient cardiac and pulmonary rehabilitation patients. *J Cardiopulm Rehabil* 1995;15:277–82.  
<http://www.ncbi.nlm.nih.gov/pubmed/8542533>
- 19 Evans RA. Developing the model of pulmonary rehabilitation for chronic heart failure. *Chron Respir Dis* 2011;8:259–69. doi:10.1177/1479972311423111
- 20 Evans RA, Singh SJ, Collier R, *et al.* Generic, symptom based, exercise rehabilitation; integrating patients with COPD and heart failure. *Respir Med* 2010;104:1473–81. doi:10.1016/j.rmed.2010.04.024
- 21 Singh SJ, Morgan MD, Scott S, *et al.* Development of a shuttle walking test of disability in patients with chronic airways obstruction. *Thorax* 1992;47:1019–24. doi:10.1136/thx.47.12.1019
- 22 Revill SM, Morgan MD, Singh SJ, *et al.* The endurance shuttle walk: a new field test for the assessment of endurance capacity in chronic obstructive pulmonary disease. *Thorax* 1999;54:213–22. doi:10.1136/thx.54.3.213
- 23 Man WD-C, Chowdhury F, Taylor RS, *et al.* Building consensus for provision of breathlessness rehabilitation for patients with chronic obstructive pulmonary disease and chronic heart failure. *Chron Respir Dis* 2016;13:229–39. doi:10.1177/1479972316642363
- 24 Yarnall AJ, Sayer AA, Clegg A, *et al.* New horizons in multimorbidity in older adults. *Age Ageing* 2017;46:882–8. doi:10.1093/ageing/afx150
- 25 Eldridge SM, Chan CL, Campbell MJ, *et al.* CONSORT 2010 statement: extension to randomised pilot and feasibility trials. *BMJ* 2016;355. doi:10.1136/bmj.i5239
- 26 Borg GA. Perceived exertion as an indicator of somatic stress. *Scand J Rehabil Med* 1970;2:92–8.  
<http://www.ncbi.nlm.nih.gov/pubmed/5523831> (accessed 19 Oct 2018).
- 27 Borg GA. Psychophysical bases of perceived exertion. *Med Sci Sports Exerc* 1982;14:377–81.  
<http://www.ncbi.nlm.nih.gov/pubmed/7154893> (accessed 19 Oct 2018).
- 28 Fried LP, Tangen CM, Walston J, *et al.* Frailty in older adults: evidence for a phenotype. *J Gerontol A Biol Sci Med Sci* 2001;56:M146–56.  
<http://www.ncbi.nlm.nih.gov/pubmed/11253156> (accessed 13 Feb 2018).
- 29 Clegg A, Young J, Iliffe S, *et al.* Frailty in elderly people. *Lancet* 2013;381:752–62. doi:10.1016/S0140-6736(12)62167-9
- 30 Maddocks M, Kon SSC, Canavan JL, *et al.* Physical frailty and pulmonary rehabilitation in COPD: a prospective cohort study. *Thorax* 2016;71:988–95.  
<http://thorax.bmj.com/lookup/doi/10.1136/thoraxjnl-2016-208460>
- 31 Jha SR, Ha HSK, Hickman LD, *et al.* Frailty in advanced heart failure: a systematic review. *Heart Fail Rev*;20. doi:10.1007/s10741-015-9493-8
- 32 Guralnik JM, Simonsick EM, Ferrucci L, *et al.* A Short Physical Performance Battery



- 1  
2  
3 Assessing Lower Extremity Function: Association With Self-Reported Disability and  
4 Prediction of Mortality and Nursing Home Admission. *J Gerontol* 1994;49:M85–94.  
5 doi:10.1093/geronj/49.2.M85  
6  
7  
8 33 Miller MR, Hankinson J, Brusasco V, *et al.* Standardisation of spirometry. *Eur Respir J*  
9 2005;26:319–38. doi:10.1183/09031936.05.00034805  
10  
11 34 Cooper BG. An update on contraindications for lung function testing. *Thorax* 2011;66:714–23.  
12 doi:10.1136/thx.2010.139881  
13  
14 35 Zigmond AS, Snaith RP. The hospital anxiety and depression scale. *Acta Psychiatr Scand*  
15 1983;67:361–70. doi:10.1111/j.1600-0447.1983.tb09716.x  
16  
17 36 Eaton T, Young P, Fergusson W, *et al.* The Dartmouth COOP Charts: A simple, reliable, valid  
18 and responsive quality of life tool for chronic obstructive pulmonary disease. *Qual Life Res*  
19 2005;14:575–85. doi:10.1007/s11136-004-0624-2  
20  
21  
22 37 Jones PW, Harding G, Berry P, *et al.* Development and first validation of the COPD  
23 Assessment Test. *Eur Respir J* 2009;34:648–54. doi:10.1183/09031936.00102509  
24  
25 38 Fletcher C. Standardised questionnaire on respiratory symptoms: a statement prepared and  
26 approved by the MRC Committee on the Aetiology of Chronic Bronchitis (MRC  
27 breathlessness score). *BMJ* 1960;2:1665.  
28  
29  
30 39 Banzett RB, O'Donnell CR, Guilfoyle TE, *et al.* Multidimensional Dyspnea Profile: an  
31 instrument for clinical and laboratory research. *Eur Respir J* 2015;45:1681–91.  
32 doi:10.1183/09031936.00038914  
33  
34  
35 40 Yorke J, Moosavi SH, Shuldham C, *et al.* Quantification of dyspnoea using descriptors:  
36 development and initial testing of the Dyspnoea-12. *Thorax* 2010;65:21–6.  
37 doi:10.1136/thx.2009.118521  
38  
39  
40 41 Ameringer S, Elswick RK, Menzies V, *et al.* Psychometric Evaluation of the Patient-Reported  
41 Outcomes Measurement Information System Fatigue-Short Form Across Diverse Populations.  
42 *Nurs Res* 2016;65:279–89. doi:10.1097/NNR.000000000000162  
43  
44 42 Nolan CM, Longworth L, Lord J, *et al.* The EQ-5D-5L health status questionnaire in COPD:  
45 validity, responsiveness and minimum important difference. *Thorax* 2016;71:493–500.  
46 doi:10.1136/thoraxjnl-2015-207782  
47  
48  
49 43 Evans RA, Singh SJ, Williams JE, *et al.* The Development of a Self-Reported Version of the  
50 Chronic Heart Questionnaire. *J Cardiopulm Rehabil Prev* 2011;31:365–72.  
51 doi:10.1097/HCR.0b013e318228a31a  
52  
53  
54 44 Freedson PS, Melanson E, Sirard J. Calibration of the Computer Science and Applications,  
55 Inc. accelerometer. *Med Sci Sports Exerc* 1998;30:777–  
56 81. <http://www.ncbi.nlm.nih.gov/pubmed/9588623> (accessed 19 Oct 2018).  
57  
58  
59 45 Gimeno-Santos E, Raste Y, Demeyer H, *et al.* The PROactive instruments to measure physical  
60 activity in patients with chronic obstructive pulmonary disease. *Eur Respir J* 2015;46:988–

1  
2  
3 1000. doi:10.1183/09031936.00183014

4  
5 46 Braun V, Clarke V. Using thematic analysis in psychology. *Qual Res Psychol* 2006;3:77–101.  
6 doi:10.1191/1478088706qp063oa  
7  
8

9  
10 **AUTHORS' CONTRIBUTIONS**

11 AVJ, RAE, DWE, LBS and SJS contributed to the design and implementation of the research and to  
12 the writing of the manuscript.  
13  
14

15  
16 **FUNDING STATEMENT**

17 Support and funding were provided by the Collaboration for Leadership in Applied Health Research  
18 and Care East Midlands (CLAHRC-EM); the Centre for Exercise and Rehabilitation Science, National  
19 Institute for Health Research (NIHR) Leicester Biomedical Research Centre- Respiratory theme; the  
20 NIHR Leicester Biomedical Research Centre- Lifestyle theme; the National Centre for Sport and  
21 Exercise Medicine, Loughborough University. Dr Rachael Evans holds a NIHR Clinician Scientist  
22 Fellowship CS-2016-16-020. The views expressed are those of the author(s) and not necessarily those  
23 of the NHS, the NIHR or the Department of Health and Social Care.  
24  
25  
26  
27  
28  
29

30  
31 **COMPETING INTERESTS**

32 The author(s) declare(s) that there is no conflict of interest.  
33  
34

35  
36 **ACKNOWLEDGEMENTS**

37 This was published as an online abstract following the 7<sup>th</sup> International Society for Physical Activity  
38 and Health Congress.  
39  
40  
41  
42

43 **WORD COUNT 3130**  
44  
45  
46  
47  
48  
49  
50  
51  
52  
53  
54  
55  
56  
57  
58  
59  
60

# BMJ Open

## Protocol for a feasibility trial to inform the development of a breathlessness rehabilitation programme for Chronic Obstructive Pulmonary Disease and Chronic Heart Failure (The COHERE Trial)

|                                 |                                                                                                                                                                                                                                                                                                                                                                                                                                                                                                                                                                                                                                                                                                                                                                                                                                                                                                                                                                                                                                                                                                                                                                                           |
|---------------------------------|-------------------------------------------------------------------------------------------------------------------------------------------------------------------------------------------------------------------------------------------------------------------------------------------------------------------------------------------------------------------------------------------------------------------------------------------------------------------------------------------------------------------------------------------------------------------------------------------------------------------------------------------------------------------------------------------------------------------------------------------------------------------------------------------------------------------------------------------------------------------------------------------------------------------------------------------------------------------------------------------------------------------------------------------------------------------------------------------------------------------------------------------------------------------------------------------|
| Journal:                        | <i>BMJ Open</i>                                                                                                                                                                                                                                                                                                                                                                                                                                                                                                                                                                                                                                                                                                                                                                                                                                                                                                                                                                                                                                                                                                                                                                           |
| Manuscript ID                   | bmjopen-2019-029387.R1                                                                                                                                                                                                                                                                                                                                                                                                                                                                                                                                                                                                                                                                                                                                                                                                                                                                                                                                                                                                                                                                                                                                                                    |
| Article Type:                   | Protocol                                                                                                                                                                                                                                                                                                                                                                                                                                                                                                                                                                                                                                                                                                                                                                                                                                                                                                                                                                                                                                                                                                                                                                                  |
| Date Submitted by the Author:   | 15-Apr-2019                                                                                                                                                                                                                                                                                                                                                                                                                                                                                                                                                                                                                                                                                                                                                                                                                                                                                                                                                                                                                                                                                                                                                                               |
| Complete List of Authors:       | <p>Jones, Amy; Loughborough University, National Centre for Sport and Exercise Medicine, School of Sport, Exercise and Health Sciences; National Institute for Health Research, Centre for Exercise and Rehabilitation Sciences, Leicester Biomedical Research Centre-Respiratory</p> <p>Evans, Rachael; University of Leicester, Respiratory Sciences; National Institute for Health Research, Centre for Exercise and Rehabilitation Sciences, Leicester Biomedical Research Centre- Respiratory</p> <p>Esliger, Dale; Loughborough University, National Centre for Sport and Exercise Medicine, Sport, Exercise and Health Sciences; National Institute for Health Research, Leicester Biomedical Research Centre- Lifestyle</p> <p>Sherar, Lauren; Loughborough University, National Centre for Sport and Exercise Medicine, School of Sport, Exercise and Health Sciences; National Institute for Health Research, Leicester Biomedical Research Centre- Lifestyle</p> <p>Singh, Sally; National Institute for Health Research, Centre for Exercise and Rehabilitation Sciences, Leicester Biomedical Research Centre-Respiratory; University of Leicester, Respiratory Sciences</p> |
| <b>Primary Subject Heading</b>: | Respiratory medicine                                                                                                                                                                                                                                                                                                                                                                                                                                                                                                                                                                                                                                                                                                                                                                                                                                                                                                                                                                                                                                                                                                                                                                      |
| Secondary Subject Heading:      | Cardiovascular medicine                                                                                                                                                                                                                                                                                                                                                                                                                                                                                                                                                                                                                                                                                                                                                                                                                                                                                                                                                                                                                                                                                                                                                                   |
| Keywords:                       | Heart failure < CARDIOLOGY, Chronic airways disease < THORACIC MEDICINE, REHABILITATION MEDICINE                                                                                                                                                                                                                                                                                                                                                                                                                                                                                                                                                                                                                                                                                                                                                                                                                                                                                                                                                                                                                                                                                          |
|                                 |                                                                                                                                                                                                                                                                                                                                                                                                                                                                                                                                                                                                                                                                                                                                                                                                                                                                                                                                                                                                                                                                                                                                                                                           |

SCHOLARONE™  
Manuscripts

1  
2  
3 **Protocol for a feasibility trial to inform the development of a breathlessness rehabilitation**  
4 **programme for Chronic Obstructive Pulmonary Disease and Chronic Heart Failure (The**  
5 **COHERE Trial)**  
6  
7

8  
9 *Amy V Jones<sup>1,2</sup>, Rachael A Evans<sup>1,2,3</sup>, Dale W Esliger<sup>1,4</sup>, Lauren B Sherar<sup>1,4</sup>, Sally J Singh<sup>1,2,3</sup>*  
10  
11

12 <sup>1</sup> National Centre for Sport and Exercise Medicine, School of Sport, Exercise and Health Sciences,  
13 Loughborough University, United Kingdom

14 <sup>2</sup> Centre for Exercise and Rehabilitation Science, National Institute for Health Research, Leicester  
15 Biomedical Research Centre-Respiratory theme, Leicester, United Kingdom

16 <sup>3</sup> Respiratory Sciences, University of Leicester, Leicester, United Kingdom

17 <sup>4</sup> National Institute for Health Research, Leicester Biomedical Research Centre-Lifestyle theme,  
18 Leicester, United Kingdom  
19  
20  
21  
22  
23

24  
25  
26 Amy V Jones (corresponding author)  
27 School of Sport, Exercise and Health Sciences  
28 National Centre for Sport and Exercise Medicine  
29 Epinal Way  
30 Loughborough University  
31 LE11 3TU  
32 [a.v.jones@lboro.ac.uk](mailto:a.v.jones@lboro.ac.uk)  
33 Tel: +44 (0)1509 226302  
34  
35  
36  
37

## 38 **ABSTRACT**

### 41 **Introduction**

42 Patients with Chronic Obstructive Pulmonary Disease (COPD) and Chronic Heart Failure (CHF)  
43 commonly suffer from exertional dyspnoea and fatigue. Exercise training is recommended in the  
44 management of both diseases, yet many of the outcome measures traditionally reported are disease  
45 specific and may not fully acknowledge the multimorbid older adult. Based on our previous research, a  
46 breathlessness rehabilitation programme for patients with COPD/CHF or combined disease has been  
47 introduced as a service improvement within University Hospital Leicester NHS Trust and has  
48 amalgamated aspects of cardiac (CR) and pulmonary (PR) rehabilitation. This has created an  
49 opportunity to expand the outcome measures assessed and introduce a holistic approach in a population  
50 that share common symptoms. Therefore, this multi-site trial will explore the feasibility of collecting  
51 novel outcome markers as part of a comprehensive assessment prior to enrolment in a breathlessness  
52 rehabilitation programme for participants with COPD and/or CHF.  
53  
54  
55  
56  
57  
58  
59  
60

## Methods and Analysis

The rehabilitation programme consists of 12 sessions, twice weekly, over a 6-week period. In addition to usual rehabilitation outcome measures, the trial will collect measures of future cardio-metabolic risk including arterial stiffness, body composition, physical activity/sedentary time, frailty, and symptom burden in a comprehensive rehabilitation assessment. The primary outcome measures will centre around feasibility (e.g. acceptability of the comprehensive rehabilitation assessment, intervention delivery and the experiences and attitudes of healthcare professionals and participants). Focus groups and interviews will be conducted further explore barriers and facilitators to the operation and participation in a breathlessness rehabilitation programme and the trial. Thematic analysis will be used for the interpretation of all qualitative data.

## Ethics and dissemination

The research ethics committee East Midlands Leicester-Central has provided ethical approval for the conduct of this trial. The results of the trial will be disseminated through appropriate conference proceedings and peer-reviewed journals.

## Trial registration number

ISRCTN11636308

## ARTICLE SUMMARY

### Strengths and limitations of this trial

- The use of a mixed methods approach in this trial is novel and will allow a breadth of information to be collected
- This trial is assessing a novel breathlessness rehabilitation programme, managed by an NHS trust. Therefore, the findings from this trial will be generalizable to routine clinical care.
- There is no comparison group or control data as rehabilitation is a NICE recommendation for both COPD and CHF.
- Spirometry is conducted in all study participants alongside a baseline measure of BNP, however a repeat echocardiogram on all participants was beyond the scope of this study.

## INTRODUCTION

Individuals with Chronic Obstructive Pulmonary Disease (COPD) and Chronic Heart Failure (CHF) commonly suffer from exertional dyspnoea and the conditions often co-exist.[1] The prevalence of COPD in the CHF population has been suggested to range from 9-52% in European and North American populations [2] and estimates of the prevalence of CHF in the COPD population are around 17 - 20.5%.[3,4]

Exercise training is recommended in the management of both diseases and forms an integral component of cardiac (CR) and pulmonary (PR) rehabilitation programmes.[1,5,6] PR is a symptom based multidisciplinary programme of exercise training, education and behaviour change.[7] Hospital days per patient [8] and healthcare utilisation [9] have been shown to be reduced with PR. Commonly reported outcome measures for PR include quality of life, and maximal and functional exercise capacity reported by the Cochrane Systematic Review on PR for COPD [10] and the 2017 National COPD PR audit in England and Wales, the latter also reporting measures of dyspnoea and muscle strength.[11] Indicators of cardiovascular risk were not reported, despite cardiovascular disease being a leading cause of death in those with mild to moderate COPD.[12]

CR is also a complex intervention and consists of health education and exercise training.[13] The 2017 UK National CR Audit reported change in self-report physical activity, smoking status, Body Mass Index (BMI), mood state, quality of life, maximal and functional exercise capacity and additional cardiovascular risk factors in all those that completed CR.[14] CR has been shown to reduce the risk of overall and CHF specific hospitalisation compared to usual care.[15] Clinically important improvements in quality of life after exercise based rehabilitation have been reported in a CHF population.[15] Despite this, just 5.2% of patients that started CR in England, Wales, Northern Ireland, Isle of Man and the Channel Islands in 2017 had a diagnosis of CHF.[14] The disability associated with CHF is more similar to COPD as opposed to a post myocardial infarction population.[16] The symptom-based model of PR including an individualised exercise prescription may be more appropriate for patients with CHF.[17]

The model of PR was successfully expanded to include patients with CHF, and in a randomised controlled trial of either PR or usual care (no rehabilitation) patients undergoing PR made improvements in exercise capacity and quality of life. [18] In the same trial, patients with CHF exercised alongside patients with COPD and the improvements in exercise capacity (assessed by the Incremental Shuttle Walk Test [ISWT] [19] and Endurance Shuttle Walk Test [ESWT]) [20] were similar across groups, regardless of diagnosis. This trial was the first to suggest the model of PR is suitable for patients with CHF, to apply a 'symptom-based' approach to rehabilitation, and to show that both groups of

1  
2  
3 patients could be trained together. Of note, in this study participants had either COPD or CHF and those  
4 with both pathologies were excluded.  
5  
6  
7

8 Creating a rehabilitation programme in which relevant and appropriate outcome measures are assessed  
9 in patients that present with similar symptoms, regardless of their primary disease, appears to be a  
10 suitable advancement within cardiopulmonary-rehabilitation.[21] Additionally, there is growing  
11 recognition of the multimorbid patient [22] and historically, this has not been assessed in either CR or  
12 PR, where the outcome measures assessed are largely disease specific. The establishment of a  
13 comprehensive rehabilitation assessment that incorporates measures from traditional CR and PR, as  
14 well as holistic measures of frailty and cardio-metabolic risk will further our knowledge of symptom-  
15 based rehabilitation to ensure a patient-centred approach, recognising the burden and multi-morbidity.  
16 At present, the feasibility of combining these outcome measures within breathlessness rehabilitation is  
17 unknown.  
18  
19  
20  
21  
22  
23  
24

25 Thus, the primary objective of the COHERE trial (COpd and HEart failure REhabilitation) will be to  
26 assess the feasibility of a breathlessness rehabilitation programme, including the collection of additional  
27 outcome measures, the delivery of the intervention and recruitment rates. The acceptability of the  
28 breathlessness rehabilitation programme and COHERE trial will be explored through the experiences  
29 and views of participants and healthcare professionals.  
30  
31  
32  
33  
34  
35

## 36 **METHODS AND ANALYSIS**

### 37 **Trial design and registration**

38 This is a multi-site feasibility trial, assessing novel outcome measures within a breathlessness  
39 rehabilitation programme for participants with a diagnosis of COPD and/or CHF. The rehabilitation  
40 programme is managed by University Hospitals of Leicester NHS Trust. Data will be collected at the  
41 Biomedical Research Centre Respiratory, Leicester, UK as well as the centres delivering rehabilitation.  
42 This trial will be conducted, analysed and reported according to the Consolidation Standards of  
43 Reporting Trials (CONSORT) statement for feasibility trials. [23]  
44  
45  
46  
47  
48  
49

50 This trial has been registered on the ISRCTN website and The University Hospitals of Leicester NHS  
51 Trust will act as study sponsor.  
52  
53  
54

### 55 **Patient and public involvement**

56 The trial design was shared with patients enrolled in the breathlessness rehabilitation programme, prior  
57 to the trial commencing. Results will be disseminated to current and former pulmonary and cardiac  
58  
59  
60



1  
2  
3 rehabilitation patients or interested members of the public within the local Pulmonary and Cardiac  
4 Rehabilitation Patient and Public Involvement Advisory group.  
5  
6  
7  
8

## 9 **Participants**

### 10 Eligibility criteria for patients

11 Patients eligible for inclusion in the trial will be: aged between 40 and 85 years, have a clinically  
12 confirmed diagnosis of COPD/CHF or combined disease, with an Medical Research Council (MRC)  
13 dyspnoea score 2 and above and will be referred to breathlessness rehabilitation as part of their standard  
14 care. COPD will be confirmed as part of the trial process through spirometry. Patients with CHF will  
15 be referred through the hospital or community heart failure service, where an echocardiogram is  
16 routinely conducted. A baseline value of BNP will be measured in all participants.  
17  
18  
19  
20  
21  
22

### 23 Eligibility criteria for healthcare professionals

24 All healthcare professionals actively involved in the breathlessness rehabilitation programme will be  
25 invited to take part in a focus group.  
26  
27  
28  
29

## 30 **Setting**

31 The current sites for the University Hospitals of Leicester NHS Trust and Leicestershire Partnership  
32 Trust (LPT) breathlessness rehabilitation programme are Glenfield Hospital, Groby Road, Leicester,  
33 UK and the National Centre for Sports and Exercise Medicine, Loughborough University,  
34 Loughborough, UK.  
35  
36  
37  
38  
39  
40

## 41 **Procedure**

42 Once a referral has been received by the rehabilitation team, eligible individuals will receive an  
43 invitation letter, reply slip and a detailed participant information sheet. This information will be given  
44 in person or sent by post. For those that decline the trial, reasons for this (if offered freely) may be  
45 taken as field notes or by an interview if participants consent to this. Interested participants will then  
46 be contacted and if appropriate, a research visit will be arranged. Once written informed consent has  
47 been provided, the participant's involvement in the trial and any relevant results will be shared with  
48 their general practitioner (GP). Data from their usual care rehabilitation assessment will be recorded.  
49 Where possible, the research visits will occur at least 14 days prior to and upon completion of the  
50 rehabilitation programme. Participants will be asked to attend the visits after an overnight fast. Upon  
51 completion of the rehabilitation programme, participants repeat the research visit and usual  
52 rehabilitation assessment. Voluntary interviews or focus groups will then occur.  
53  
54  
55  
56  
57  
58  
59  
60



### Intervention: Breathlessness rehabilitation programme

The breathlessness rehabilitation programme is led by experienced physiotherapists, nurses and healthcare professionals. The programme consists of 12 supervised classes (typically twice a week for six weeks), with each class consisting of exercise training and education. The exercises consist of a combination of traditional CR and PR activities. Participants are led through a progressive warm up, before completing individually prescribed aerobic and strength exercises. The aerobic components include walking (floor or treadmill) and stationary cycle ergometers. The ISWT [19] is used to predict peak oxygen consumption ( $\text{VO}_2$ ) and walking speed is prescribed at 80-85% peak  $\text{VO}_2$ . [20] The Borg Scale of Perceived Exertion [24] and the Modified Borg Breathlessness Scale [25] are used to progress the exercise prescription. The strength component consists of sit-to-stand exercises (weighted if appropriate), bicep curls, upright rows and step ups. Participants are encouraged to complete 10 repetitions of each strength exercise 3 times per class. Participants are then led through a supervised cool-down before the educational component of the class. The educational topics covered within the breathlessness rehabilitation programme are presented in table 1. Outside of the supervised classes, participants are encouraged to complete a timed walk every day and strength training once a week at home/ unsupervised.

*Table 1: Educational topics covered within breathlessness rehabilitation programme*

|                                     |                                                                                                                                                                                            |
|-------------------------------------|--------------------------------------------------------------------------------------------------------------------------------------------------------------------------------------------|
| All patients                        | Benefits of exercise<br>Managing breathlessness<br>Relaxation techniques<br>Healthy eating<br>Energy conservation<br>Goal setting<br>Managing anxiety<br>Question and Answers/ Signposting |
| Groups divided by primary diagnosis | Medications<br>Disease education<br>Managing exacerbations/ symptom control<br>Chest clearance/ FAQs                                                                                       |

### Acceptability

The acceptability of the COHERE trial and the breathlessness rehabilitation programme will be assessed by the following, although not limited to:

- A. Participant's experience of the COHERE trial will be explored in qualitative interviews and focus groups
- B. Participant's experience of the breathlessness rehabilitation programme will be explored in qualitative interviews and focus groups
- C. Proportion of participants who attended the follow up research visit and reasons why participants did not complete the trial (assessed by interviews)

- 1  
2  
3 D. The experience of healthcare professionals regarding the breathlessness rehabilitation  
4 programme, such as their confidence in working with varied cardiorespiratory patients, the  
5 content/ structure of the breathlessness rehabilitation programme and the combining of CR and  
6 PR staff  
7  
8  
9 E. The views of healthcare professionals regarding the COHERE trial, such as the collection of  
10 additional outcome measures and coordination of the programme with the trial.  
11  
12

### 13 Feasibility

14 Measures for assessing feasibility are provided in table 2 and will include the comprehensive  
15 rehabilitation assessment, intervention delivery and recruitment.  
16  
17  
18  
19  
20

21 *Table 2: Feasibility of assessment and outcome measures*

| 22 INDICATORS                                                                                                                                        | 23 DATA SOURCES                                                                     |
|------------------------------------------------------------------------------------------------------------------------------------------------------|-------------------------------------------------------------------------------------|
| <b>24 <i>Comprehensive Rehabilitation Assessment</i></b>                                                                                             |                                                                                     |
| 25 Completeness of additional outcome measures                                                                                                       | 26 Case report forms                                                                |
| 27 Acceptability                                                                                                                                     | 28 Interviews and focus groups with participants and<br>29 healthcare professionals |
| <b>30 <i>Intervention delivery &amp; Process Evaluation</i></b>                                                                                      |                                                                                     |
| 31 Completeness of usual care outcome measures                                                                                                       | 32 Rehabilitation records                                                           |
| 33 Number of rehabilitation classes completed                                                                                                        | 34 Rehabilitation records                                                           |
| 35 Number of participants that drop-out from<br>36 rehabilitation programme                                                                          | 37 Rehabilitation records                                                           |
| 38 The experience of healthcare professionals regarding<br>39 breathlessness rehabilitation and the COHERE trial                                     | 40 Interviews and focus groups with healthcare<br>41 professionals                  |
| 42 The experience of participants regards breathlessness<br>43 rehabilitation and the COHERE trial                                                   | 44 Interviews and focus groups with participants                                    |
| 45 The training and resources needed to deliver the<br>46 intervention                                                                               | 47 Interviews and focus groups with healthcare<br>48 professionals                  |
| <b>49 <i>Recruitment</i></b>                                                                                                                         |                                                                                     |
| 50 Feasibility of screening and recruiting participants                                                                                              | 51 Trial records and field notes                                                    |
| 52 Number of eligible participants, number of<br>53 participants invited to participate in trial, number of<br>54 participants that consent to trial | 55 Medical records and trial records                                                |
| 56 Number of participants that decline or drop out of trial                                                                                          | 57 Trial records                                                                    |
| 58                                                                                                                                                   | 59                                                                                  |
| 60                                                                                                                                                   |                                                                                     |

## Data collection

Data will be collected following standard operating procedures and will occur during specific research visits and usual care rehabilitation appointments. The timing of baseline and follow up data collection cannot be standardised due to variation in the timing of participant's starting and completing rehabilitation. Recruitment will occur from May 2018 to June 2020, with data collection ongoing until August 2020.

## Sample characteristics

### Body composition

At both research visits, height, weight and waist circumference will be measured to the nearest 0.1cm, 0.1kg and 0.1cm respectively. Waist circumference will be measured twice, unless the difference between the first two measurements is >3cm, in which case a third measurement will be taken. Bioelectrical Impedance Analysis (BIA) will be performed using a dual sensor scale (Tanita MC-780 MA P; Tanita, Tokyo, Japan).

### Physical function

The following three assessments are usual care and will be completed by healthcare professionals:

1. Maximal exercise capacity will be assessed using the ISWT.[19]
2. Endurance exercise capacity will be assessed using the ESWT,[20] in which a participant aims to walk at 85% of their maximal ISWT walking speed.
3. Quadriceps strength will be assessed using an isometric maximum voluntary contraction (QMVC). Participants will identify their dominant leg and where possible, three attempts will be made.

### Frailty

Frailty is a clinical syndrome that is highly prevalent in old age [26] and focuses on a holistic approach as opposed to organ-specific diagnoses.[27] It has been suggested that 25% of patients with COPD that are referred to PR [28] are frail and it is highly prevalent in those with CHF.[29] The Short Physical Performance Battery (SPPB) [30] will be measured which comprises of a series of three brief assessments; a standing balance test, a gait speed test and repeated sit-to stand tests.

### Cardio-metabolic health

Venous blood samples will be analysed for triglycerides, total cholesterol, low-density lipoproteins, high-density lipoproteins, glycated haemoglobin, plasma glucose, fibrinogen, high-sensitivity c-reactive protein and B type natriuretic peptide (BNP). BNP will only be analysed at the baseline research visit. All samples assessing cardio-metabolic health will be taken in a fasted state.

1  
2  
3  
4  
5 Arterial stiffness will be assessed, specifically pulse wave velocity and pulse wave analysis using the  
6 Vicorder (Smart Medical, Gloucestershire, UK), according to manufacturer's instructions. Participants  
7 will rest in the supine position for 5 minutes, before any measurements are taken. The air temperature  
8 in the room will be set at 21°C and the participants will lie on a bed set to 30° with a pillow supporting  
9 them.  
10  
11  
12

#### 13 14 Respiratory health

15 Lung function will be assessed by forced spirometry using a Vitalograph Pneumotrac 6800  
16 (Vitalograph, Buckingham, UK) according to international guidelines.[31] The device will be calibrated  
17 daily, and the pass/fail criteria is +/-3.0% of a fixed 3L volume. The absolute and relative  
18 contraindications will be examined for each participant.[32] Participants will wear a nose clip during  
19 each attempt.  
20  
21  
22  
23

#### 24 25 Symptoms and Psychosocial health

26 Questionnaires will be used to assess the presence and severity of participants' symptoms. The Hospital  
27 Anxiety and Depression Scale (HADS)[33], the Dartmouth COOP charts [34], the COPD Assessment  
28 Test (CAT) [35] and the MRC breathlessness score [36] are collected in routine care. The latter two  
29 questionnaires are only routinely collected in those with a primary diagnosis of COPD, yet for research  
30 purposes, the MRC will be collected in all research participants. The Multidimensional Dyspnea Profile  
31 (MDP)[37] and the Dyspnea-12 (D-12) [38] will be used to assess breathlessness; the time frame for  
32 the MDP will state 'the last two weeks'. Fatigue will be assessed using the PROMIS Fatigue 7a Short  
33 Form [39] and health related quality of life will be assessed using the EQ-5D-5L.[40] The Chronic  
34 Heart Questionnaire Self Report [41] will be given to all participants to assess dyspnoea, fatigue and  
35 emotional function. Where possible, participants will independently complete the questionnaires.  
36 Efforts will be made to ensure all questionnaires are completed for research participants. The protocol  
37 has largely been developed to explore symptom-based and non-disease specific questionnaires due to  
38 the population being recruited.  
39  
40  
41  
42  
43  
44  
45  
46  
47  
48

#### 49 Objectively measured physical activity and time spent sedentary

50 Participants will be asked to wear a triaxial accelerometer (ActiGraph wGT3X-BT) using an adjustable  
51 waist belt with the monitor positioned over the right hip (midclavicular line) for 8 consecutive days  
52 preceding and again upon completion of rehabilitation. This will measure time spent sedentary and in  
53 physical activity (i.e. light, moderate and vigorous intensity) using cut-points, such as those published  
54 by Freedson et al [42] and step count. Participants will be asked to wear the device during all waking  
55 hours but to remove it for water-based activities and during sleep. The accelerometer will also be given  
56 to participants to wear during their usual care assessments and during each rehabilitation class.  
57  
58  
59  
60

### Self-reported physical activity

The clinical visit Pro-Active Questionnaire will be used, [43] in which participants recall physical activity over the last 7 days using a 35-item questionnaire. This is a hybrid tool containing self-report information and two variables derived from the accelerometer.

### Sample size estimation and recruitment target

As this is a feasibility trial, a formal sample size calculation is not required; however, the aim is to consent a minimum of 40 participants with a representative mix of COPD, CHF and combined disease. The information gathered from this trial will be used to guide a sample size calculation for future studies. Posters raising awareness of the trial and the breathlessness rehabilitation programme will be placed within clinic rooms, the exercise rehabilitation departments and online through UHL staff intranet. Efforts will also be made to raise awareness of the trial and the breathlessness rehabilitation programme with clinicians and healthcare professionals whom regularly refer patients.

### Quantitative data analyses

As this is a feasibility trial, it is not appropriate to test for statistical differences over time or between groups. Therefore, quantitative data will be largely descriptive. Independent t-tests or analysis of variance (ANOVA) may be used to examine between group differences and paired sample t-tests or repeated measures ANOVA may be used to examine within group differences. Categorical data may be analysed using a chi-square or fishers exact test. Data will be entered and stored on a secure web-based system, Research Electronic data Capture (REDCap) as well as local password-protected computer files and drives. Analyses will be performed using Statistical Package for the Social Sciences (SPSS) (Version 23.0, IBM Corp, Armonk, NY).

Participants will be provided with a unique identification number, ensuring their data remains confidential. Any written materials or results will be written to ensure participant data remains confidential.

### Qualitative research

The aim of the qualitative research will be to explore the participants' experience of a) the breathlessness rehabilitation programme b) the COHERE trial and c) any barriers or facilitators to participating and completing breathlessness rehabilitation. Participants that decline the trial are invited to a refusal interview, either face to face or over the telephone, providing consent is given. The qualitative data may provide information regarding the feasibility and scalability of the trial, reducing

1  
2  
3 future recruitment or retention issues. Upon completion of the trial, research participants will be invited  
4 to a voluntary focus group or interview.  
5  
6

7  
8 Focus groups and/or interviews will be conducted with healthcare professionals that have been actively  
9 involved in the COHERE trial, whereby the objective is to seek to understand the barriers, facilitators  
10 and experiences on the delivery and implementation of the breathlessness rehabilitation programme and  
11 the scalability of the COHERE trial in the future.  
12  
13

### 14 15 16 **Qualitative data analysis**

17 The qualitative data will be recorded, transcribed and analysed using thematic analysis. Thematic  
18 analysis allows emerging, recurrent themes or patterns to be identified from the data. [44] All interviews  
19 and focus groups will be audio recorded with participant's consent and transcribed verbatim. Emerging  
20 themes will be identified throughout the trial, meaning the interview schedule and coding schedule are  
21 modified to follow new leads until new themes no longer emerge. In line with thematic analysis, there  
22 is no pre-specified sample size; recruitment continues until no new themes emerge.  
23  
24  
25  
26  
27

### 28 29 **ETHICS AND DISSEMINATION**

30 Findings from this feasibility trial will inform the design of future trials, largely the primary outcome  
31 measure and trial protocol. Furthermore, the findings will be shared locally with secondary care  
32 interface groups such as service managers. Some trial findings may be shared with national and  
33 international visitors who come to share our practice and a summary of the trial results will also be  
34 provided to participants. It is anticipated that the results from this feasibility trial will be presented at  
35 appropriate national, international and regional conferences; local trial days; and through peer-reviewed  
36 journals.  
37  
38  
39  
40  
41

### 42 43 **Research ethics approval**

44 The trial is sponsored by the University Hospitals of Leicester NHS Trust (trial number 105410) and  
45 ethical approval was given by Leicester South Research Ethics Committee (REC reference:  
46 18/EM/0051). Guidelines will be followed when protocol amendments are needed.  
47  
48  
49

### 50 51 **Protocol amendments**

52 Any modifications to the protocol will be approved by Leicester South Research Ethics Committee  
53 prior to implementation and notified to the health authorities in accordance with local regulations.  
54  
55

### 56 57 **FULL REFERENCES**

- 58 1 Global Initiative for Chronic Obstructive Lung Disease (GOLD). Global Strategy for the  
59 Diagnosis, Management, and Prevention of Chronic Obstructive Pulmonary Disease. 2016.  
60



- 1  
2  
3 <http://goldcopd.org>  
4  
5 2 Hawkins NM, Petrie MC, Jhund PS, *et al.* Heart failure and chronic obstructive pulmonary  
6 disease: diagnostic pitfalls and epidemiology. *Eur J Heart Fail* 2009;11:130–9.  
7 doi:10.1093/eurjhf/hfn013  
8  
9 3 Rutten FH, Cramer MJ, Grobbee DE, *et al.* Unrecognized heart failure in elderly patients with  
10 stable chronic obstructive pulmonary disease. *Eur Heart J* 2005;26:1887–94.  
11 doi:10.1093/eurheartj/ehi291  
12  
13 4 Macchia A, Rodriguez Moncalvo JJ, Kleinert M, *et al.* Unrecognised ventricular dysfunction  
14 in COPD. *Eur Respir J* 2012;39:51–8. doi:10.1183/09031936.00044411  
15  
16 5 British Thoracic Society. Quality Standards for Pulmonary Rehabilitation in Adults. 2014.  
17 [https://www.brit-thoracic.org.uk/document-library/clinical-information/pulmonary-](https://www.brit-thoracic.org.uk/document-library/clinical-information/pulmonary-rehabilitation/bts-quality-standards-for-pulmonary-rehabilitation-in-adults/)  
18 [rehabilitation/bts-quality-standards-for-pulmonary-rehabilitation-in-adults/](https://www.brit-thoracic.org.uk/document-library/clinical-information/pulmonary-rehabilitation/bts-quality-standards-for-pulmonary-rehabilitation-in-adults/)  
19  
20 6 British Association for Cardiovascular Prevention and Rehabilitation. The BACPR Standards  
21 and Core Components for Cardiovascular Disease Prevention and Rehabilitation 2012. 2012.  
22  
23 7 Spruit MA, Singh SJ, Garvey C, *et al.* An Official American Thoracic Society/European  
24 Respiratory Society Statement: Key concepts and Advances in Pulmonary Rehabilitation. *Am*  
25 *J Respir Crit Care Med* 2013;188:e13–64. doi:10.1164/rccm.201309-1634ST  
26  
27 8 Griffiths TL, Burr ML, Campbell IA, *et al.* Results at 1 year of outpatient multidisciplinary  
28 pulmonary rehabilitation: a randomised controlled trial. *Lancet* 2000;355:362–8.  
29 doi:10.1016/S0140-6736(99)07042-7  
30  
31 9 Raskin J, Spiegler P, McCusker C, *et al.* The effect of pulmonary rehabilitation on healthcare  
32 utilization in chronic obstructive pulmonary disease: The Northeast Pulmonary Rehabilitation  
33 Consortium. *J Cardiopulm Rehabil* 2006;26:231–  
34 6.<http://www.ncbi.nlm.nih.gov/pubmed/16926687>  
35  
36 10 McCarthy B, Casey D, Devane D, *et al.* Pulmonary rehabilitation for chronic obstructive  
37 pulmonary disease. *Cochrane Database Syst Rev* Published Online First: 2015.  
38 doi:10.1002/14651858.CD003793.pub3  
39  
40 11 Steiner MC, Holzhauser- Barrie J, Lowe D, *et al.* Pulmonary Rehabilitation: Steps to breathe  
41 better. National Chronic Obstructive Pulmonary Disease (COPD) Audit Programme: Clinical  
42 audit of Pulmonary Rehabilitation services in England and Wales 2015. 2016.  
43 <https://www.rcplondon.ac.uk/projects/outputs/pulmonary-rehabilitation-steps-breathe-better>  
44  
45 12 Patel ARC, Hurst JR. Extrapulmonary comorbidities in chronic obstructive pulmonary disease:  
46 state of the art. *Expert Rev Respir Med* 2011;5:647–62. doi:10.1586/ers.11.62  
47  
48 13 Dalal H. Cardiac rehabilitation. *Br Med J* 2015;351. doi:10.1136/bmj.h5000  
49  
50 14 British Heart Foundation. National Audit of Cardiac Rehabilitation: Annual Statistical Report  
51 2017. 2017. [https://www.bhf.org.uk/publications/statistics/national-audit-of-cardiac-](https://www.bhf.org.uk/publications/statistics/national-audit-of-cardiac-rehabilitation-annual-statistical-report-2017)  
52 [rehabilitation-annual-statistical-report-2017](https://www.bhf.org.uk/publications/statistics/national-audit-of-cardiac-rehabilitation-annual-statistical-report-2017)  
53  
54  
55  
56  
57  
58  
59  
60

- 1  
2  
3 15 Sagar VA, Davies EJ, Briscoe S, *et al.* Exercise-based rehabilitation for heart failure:  
4 systematic review and meta-analysis. *Open Hear* 2015;2:1–12. doi:10.1136/openhrt-2014-  
5 000163  
6  
7  
8 16 Reardon JZ, Levine S, Peske G, *et al.* A comparison of outpatient cardiac and pulmonary  
9 rehabilitation patients. *J Cardiopulm Rehabil* 1995;15:277–  
10 82.<http://www.ncbi.nlm.nih.gov/pubmed/8542533>  
11  
12 17 Evans RA. Developing the model of pulmonary rehabilitation for chronic heart failure. *Chron*  
13 *Respir Dis* 2011;8:259–69. doi:10.1177/1479972311423111  
14  
15 18 Evans RA, Singh SJ, Collier R, *et al.* Generic, symptom based, exercise rehabilitation;  
16 integrating patients with COPD and heart failure. *Respir Med* 2010;104:1473–81.  
17 doi:10.1016/j.rmed.2010.04.024  
18  
19 19 Singh SJ, Morgan MD, Scott S, *et al.* Development of a shuttle walking test of disability in  
20 patients with chronic airways obstruction. *Thorax* 1992;47:1019–24.  
21 doi:10.1136/thx.47.12.1019  
22  
23 20 Revill SM, Morgan MD, Singh SJ, *et al.* The endurance shuttle walk: a new field test for the  
24 assessment of endurance capacity in chronic obstructive pulmonary disease. *Thorax*  
25 1999;54:213–22. doi:10.1136/thx.54.3.213  
26  
27 21 Man WD-C, Chowdhury F, Taylor RS, *et al.* Building consensus for provision of  
28 breathlessness rehabilitation for patients with chronic obstructive pulmonary disease and  
29 chronic heart failure. *Chron Respir Dis* 2016;13:229–39. doi:10.1177/1479972316642363  
30  
31 22 Yarnall AJ, Sayer AA, Clegg A, *et al.* New horizons in multimorbidity in older adults. *Age*  
32 *Ageing* 2017;46:882–8. doi:10.1093/ageing/afx150  
33  
34 23 Eldridge SM, Chan CL, Campbell MJ, *et al.* CONSORT 2010 statement: extension to  
35 randomised pilot and feasibility trials. *Br Med J* 2016;355:i5239. doi:10.1136/bmj.i5239  
36  
37 24 Borg GA. Perceived exertion as an indicator of somatic stress. *Scand J Rehabil Med*  
38 1970;2:92–8.<http://www.ncbi.nlm.nih.gov/pubmed/5523831> (accessed 19 Oct 2018).  
39  
40 25 Borg GA. Psychophysical bases of perceived exertion. *Med Sci Sports Exerc* 1982;14:377–  
41 81.<http://www.ncbi.nlm.nih.gov/pubmed/7154893> (accessed 19 Oct 2018).  
42  
43 26 Fried LP, Tangen CM, Walston J, *et al.* Frailty in older adults: evidence for a phenotype. *J*  
44 *Gerontol A Biol Sci Med Sci* 2001;56:M146-  
45 56.<http://www.ncbi.nlm.nih.gov/pubmed/11253156> (accessed 13 Feb 2018).  
46  
47 27 Clegg A, Young J, Iliffe S, *et al.* Frailty in elderly people. *Lancet* 2013;381:752–62.  
48 doi:10.1016/S0140-6736(12)62167-9  
49  
50 28 Maddocks M, Kon SSC, Canavan JL, *et al.* Physical frailty and pulmonary rehabilitation in  
51 COPD: a prospective cohort study. *Thorax* 2016;71:988–  
52 95.<http://thorax.bmj.com/lookup/doi/10.1136/thoraxjnl-2016-208460>  
53  
54 29 Jha SR, Ha HSK, Hickman LD, *et al.* Frailty in advanced heart failure: a systematic review.  
55  
56  
57  
58  
59  
60



- 1  
2  
3 *Heart Fail Rev*;20. doi:10.1007/s10741-015-9493-8
- 4  
5 30 Guralnik JM, Simonsick EM, Ferrucci L, *et al.* A Short Physical Performance Battery  
6 Assessing Lower Extremity Function: Association With Self-Reported Disability and  
7 Prediction of Mortality and Nursing Home Admission. *J Gerontol* 1994;49:M85–94.  
8 doi:10.1093/geronj/49.2.M85
- 9  
10  
11 31 Miller MR, Hankinson J, Brusasco V, *et al.* Standardisation of spirometry. *Eur Respir J*  
12 2005;26:319–38. doi:10.1183/09031936.05.00034805
- 13  
14 32 Cooper BG. An update on contraindications for lung function testing. *Thorax* 2011;66:714–23.  
15 doi:10.1136/thx.2010.139881
- 16  
17 33 Zigmond AS, Snaith RP. The hospital anxiety and depression scale. *Acta Psychiatr Scand*  
18 1983;67:361–70. doi:10.1111/j.1600-0447.1983.tb09716.x
- 19  
20 34 Eaton T, Young P, Fergusson W, *et al.* The Dartmouth COOP Charts: A simple, reliable, valid  
21 and responsive quality of life tool for chronic obstructive pulmonary disease. *Qual Life Res*  
22 2005;14:575–85. doi:10.1007/s11136-004-0624-2
- 23  
24 35 Jones PW, Harding G, Berry P, *et al.* Development and first validation of the COPD  
25 Assessment Test. *Eur Respir J* 2009;34:648–54. doi:10.1183/09031936.00102509
- 26  
27 36 Fletcher C. Standardised questionnaire on respiratory symptoms: a statement prepared and  
28 approved by the MRC Committee on the Aetiology of Chronic Bronchitis (MRC  
29 breathlessness score). *BMJ* 1960;2:1665.
- 30  
31 37 Banzett RB, O'Donnell CR, Guilfoyle TE, *et al.* Multidimensional Dyspnea Profile: an  
32 instrument for clinical and laboratory research. *Eur Respir J* 2015;45:1681–91.  
33 doi:10.1183/09031936.00038914
- 34  
35 38 Yorke J, Moosavi SH, Shuldham C, *et al.* Quantification of dyspnoea using descriptors:  
36 development and initial testing of the Dyspnoea-12. *Thorax* 2010;65:21–6.  
37 doi:10.1136/thx.2009.118521
- 38  
39 39 National Institutes of Health. PROMIS domain framework/ definitions.  
40 2007.<http://www.nihpromis.org/measures/domainframework> (accessed 10 Dec 2018).
- 41  
42 40 Nolan CM, Longworth L, Lord J, *et al.* The EQ-5D-5L health status questionnaire in COPD:  
43 validity, responsiveness and minimum important difference. *Thorax* 2016;71:493–500.  
44 doi:10.1136/thoraxjnl-2015-207782
- 45  
46 41 Evans RA, Singh SJ, Williams JE, *et al.* The Development of a Self-Reported Version of the  
47 Chronic Heart Questionnaire. *J Cardiopulm Rehabil Prev* 2011;31:365–72.  
48 doi:10.1097/HCR.0b013e318228a31a
- 49  
50 42 Freedson PS, Melanson E, Sirard J. Calibration of the Computer Science and Applications,  
51 Inc. accelerometer. *Med Sci Sports Exerc* 1998;30:777–  
52 81.<http://www.ncbi.nlm.nih.gov/pubmed/9588623> (accessed 19 Oct 2018).
- 53  
54 43 Gimeno-Santos E, Raste Y, Demeyer H, *et al.* The PROactive instruments to measure physical

- 1  
2  
3 activity in patients with chronic obstructive pulmonary disease. *Eur Respir J* 2015;46:988–  
4 1000. doi:10.1183/09031936.00183014  
5  
6 44 Braun V, Clarke V. Using thematic analysis in psychology. *Qual Res Psychol* 2006;3:77–101.  
7 doi:10.1191/1478088706qp063oa  
8  
9

### 10 11 **AUTHORS' CONTRIBUTIONS**

12 AJ, RE, DE, LS and SS contributed to the conception and design of the study. AJ drafted the manuscript.  
13 AJ, RE, DS, LS and SS revised the content and approved the final version to be published. AJ, RE,  
14 DS, LS and SS are accountable for all aspects of the work.  
15  
16  
17

### 18 19 **FUNDING STATEMENT**

20 Support and funding were provided by the Collaboration for Leadership in Applied Health Research  
21 and Care East Midlands (CLAHRC-EM), the NIHR Leicester Biomedical Research Centre, the  
22 National Centre for Sport and Exercise Medicine (NCSEM) and the Centre for Exercise and  
23 Rehabilitation Science (CERS), University Hospitals of Leicester NHS trust. Dr Rachael Evans holds  
24 a NIHR Clinician Scientist Fellowship CS-2016-16-020. The views expressed are those of the  
25 author(s) and not necessarily those of the NHS, the NIHR or the Department of Health and Social  
26 Care.  
27  
28  
29  
30  
31  
32

### 33 34 **COMPETING INTERESTS**

35 The author(s) declare(s) that there is no conflict of interest  
36  
37

38 **WORD COUNT 3189**  
39  
40  
41  
42  
43  
44  
45  
46  
47  
48  
49  
50  
51  
52  
53  
54  
55  
56  
57  
58  
59  
60
